# Supplementary material
Source: PubMed Central journal article supplement (PMC5730411)
Supplement: NIHMS889678-supplement-Supplementary_Tables.pdf [file NIHMS889678-supplement-Supplementary_Tables.pdf]

## Supplementary Tables

| Construct                        | Gene size (bp)           | Gene size (kDa)        | Mechanism of activation                                                                                           | Activator                                    | Editing Kinetics Reported                                                                              | Earliest Timepoint at which indels detected                            | Single-component | Dose-dependent editing demonstrated                       | Specificity relative to WT Cas9 | Reference   |
|----------------------------------|--------------------------|------------------------|-------------------------------------------------------------------------------------------------------------------|----------------------------------------------|--------------------------------------------------------------------------------------------------------|------------------------------------------------------------------------|------------------|-----------------------------------------------------------|---------------------------------|-------------|
| ciCas9                           | 4521                     | 173                    | Disruption of autoinhibitory BCL-xL/BH3 Protein-peptide interaction                                               | A-385358, WEHI-539, ABT-737, et al.          | Indels + DSBs                                                                                          | 30 min (AAVS1, VEGFAG2, EMX1*)<br>2 h (MYC sgRNA4 and sgRNA5, VEGFAG2) | Yes              | Yes                                                       | Improved                        | This report |
| iCas9                            | 8058                     | 305                    | ERT2-mediated nuclear localization                                                                                | 4-HT                                         | Indels (no statistics, errors, or clear indication of replicates reported for time points before 12 h) | 2h (EMX1, no statistics or replicates reported)                        | Yes              | No*                                                       | Improved                        | 8           |
| intein-Cas9                      | 5451                     | 208                    | Excision of intein                                                                                                | 4-HT                                         | Indels (12 - 96h), reported in <sup>6</sup>                                                            | Not tested prior to 12 h                                               | Yes              | No                                                        | Improved                        | 10          |
| split-Cas9                       | 4974                     | 189                    | Reconstitution of split-Cas9 via induced dimerization                                                             | Rapamycin                                    | Indels (12 - 96h), reported in <sup>6</sup>                                                            | Not tested prior to 12 h                                               | No               | No                                                        | Not reported                    | 11          |
| arC9                             | 4905                     | 189                    | Allosteric effect of 4HT binding                                                                                  | 4-HT                                         | No                                                                                                     | NA                                                                     | Yes              | Yes                                                       | Not reported                    | 12          |
| paCas9                           | 5469*                    | 207                    | Reconstitution of split-Cas9 via induced dimerization                                                             | Blue light                                   | Indels                                                                                                 | 9h (EMX1)                                                              | No               | No                                                        | Not reported                    | 9           |
| split-Cas9-ERT                   | 6924*                    | 263                    | Reconstitution of split-Cas9 via Rapamycin induced dimerization + 4-HT induced ERT2-mediated nuclear localization | Rapamycin and/or 4HT                         | No                                                                                                     | NA                                                                     | No               | Demonstrated for transcriptional control, but not editing | Not reported                    | 13          |
| DIG-Cas9, PRO-Cas9               | 4566                     | 176                    | Small-molecule mediated stabilization of destabilized ligand binding domain fused to Cas9                         | Digoxin, Progesterone                        | No                                                                                                     | NA                                                                     | Yes              | No                                                        | Not reported                    | 14          |
| DD-Cas9                          | Not reported             | Not reported           | Small-molecule mediated stabilization of destabilized ligand binding domain fused to Cas9                         | Shield-1 (rapalog)                           | No                                                                                                     | NA                                                                     | Yes              | No                                                        | Not reported                    | 15          |
| DD regulated Cas9 (DD.SpCas9,DD) | 5175 (DHFR), 5697 (ER50) | 198 (DHFR), 218 (ER50) | Small-molecule mediated stabilization of destabilized ligand binding domains (DHFR or ER50) fused to Cas9         | Trimethoprim (DHFR), 4HT (ER50), CMP8 (ER50) | No                                                                                                     | NA                                                                     | Yes              | Yes                                                       | Improved                        | 16          |

**Supplementary Table 1 | Comparison of inducible Cas9 variants.** NA – not applicable. \*Size (bp) includes 2 stop codons. Indicated split-Cas9 constructs delivered via 2 plasmids.

| <b>Method</b>                   | <b>Site specific</b> | <b>Multiplex</b> | <b>Absolute quantitation demonstrated</b> | <b>References</b> |
|---------------------------------|----------------------|------------------|-------------------------------------------|-------------------|
| Immunodetection                 | No                   | Yes              | No                                        | 17                |
| Comet                           | No                   | No               | No                                        | 18                |
| Pulse-field gel electrophoresis | No                   | No               | No                                        | 19                |
| BLESS/DSB-capture               | No                   | Yes              | No                                        | 24,31             |
| GUIDE-Seq                       | No                   | Yes              | No                                        | 20                |
| qPCR                            | Yes                  | No               | No                                        | 21,22             |
| Enzymatic methods               | Yes                  | Yes              | No                                        | 23                |
| DSB-ddPCR                       | Yes                  | No               | Yes                                       | This work         |

**Supplementary Table 2 | Comparison of methods for detecting DSBs.**

| <b>Time (h)</b> | <b>0</b>      | <b>0.167</b>  | <b>0.5</b>  | <b>2</b>  | <b>4</b>   | <b>8</b>   | <b>24</b>  |
|-----------------|---------------|---------------|-------------|-----------|------------|------------|------------|
| AAVS1           | 0.15±0.09     | 0.38±0.03     | 0.47±0.02   | 2.59±0.14 | 5.64±0.52  | 10.41±1.52 | 17.04±0.84 |
| MYC sgRNA5      | 0.37±0.07     | 0.47±0.11     | 0.44±0.12   | 1.42±0.04 | 2.31±0.31  | 6.05±0.61  | 12.07±0.75 |
| VEGFA sgRNA2    | 0.0012±0.0006 | 0.0069±0.0031 | 0.009±0.008 | 0.44±0.12 | 0.60±0.05  | 1.43±0.13  | 5.08±1.62  |
| VEGFA sgRNA3    | 1.59±0.11     | 2.05±0.09     | 2.49±0.39   | 6.92±0.47 | 10.52±0.58 | 15.76±0.33 | 26.72±0.58 |

**Supplementary Table 3 | Indel kinetics for multiple sgRNAs.** Indel frequencies (% ± s.e.m., n = 3 cell culture replicates) plotted in **Fig. 1d**.

| <b>Time (h)</b> | <b>0.167</b> | <b>0.5</b> | <b>2</b> | <b>4</b> | <b>8</b> | <b>24</b> |
|-----------------|--------------|------------|----------|----------|----------|-----------|
| AAVS1           | 0.0348       | 0.0121     | 5.71E-05 | 0.000249 | 0.00126  | 1.81E-05  |
| MYC sgRNA5      | 0.254        | 0.317      | 8.56E-05 | 0.00191  | 0.000373 | 5.091E-05 |
| VEGFA sgRNA2    | 0.0689       | 0.196      | 0.0103   | 0.000148 | 0.000199 | 0.0174    |
| VEGFA sgRNA3    | 0.0154       | 0.0464     | 0.000195 | 5.73E-05 | 1.13E-06 | 9.02E-07  |

**Supplementary Table 4 | *P*-values for comparisons to respective zero hour time point.** *P*-values for comparisons of each time point to the zero hour time point for each sgRNA as plotted in **Fig. 1d**. All sgRNAs exhibit statistically significant increase in indels by 2 hours. *P*-values were calculated using a one-sided two-sample Student's t-test (n = 3 cell culture replicates).

| Variant         | BH3 peptide sequence                 | K <sub>i</sub> (nM) |
|-----------------|--------------------------------------|---------------------|
| G22<br>(ciCas9) | APPNLWAAQRYGRELRRMADE <u>G</u> EGSFK | 48 ± 5              |
| A22             | APPNLWAAQRYGRELRRMADE <u>A</u> EGSFK | 36 ± 2              |
| V22             | APPNLWAAQRYGRELRRMADE <u>V</u> EGSFK | 20 ± 3              |
| L22             | APPNLWAAQRYGRELRRMADE <u>L</u> EGSFK | 1.7 ± 0.2           |
| F22             | APPNLWAAQRYGRELRRMADE <u>F</u> EGSFK | < 0.5               |

**Supplementary Table 5 | BH3 variant peptide sequences and BCL-xL K<sub>i</sub>'s.**

| Compound  | BCL-xL K <sub>i</sub> (nM) | Selectivity         | Dose (mg/kg)     | C <sub>max</sub> (μM) | Exposure                          | Dosing | Species | Reference     |
|-----------|----------------------------|---------------------|------------------|-----------------------|-----------------------------------|--------|---------|---------------|
| ABT-263   | 0.40                       | dual BCL-2 / BCL-xL | 100              | 7.66 <sup>†</sup>     | > 3.8 μM for 5.7 h <sup>†</sup>   | p.o.   | Mouse   | <sup>43</sup> |
| ABT-263   | 0.40                       | dual BCL-2 / BCL-xL | 315 <sup>§</sup> | 4.46 <sup>§</sup>     | >1.7 μM for 24 hours <sup>§</sup> | p.o.   | Human   | <sup>44</sup> |
| ABT-737   | 0.080                      | dual BCL-2 / BCL-xL | 100              | 5.94                  | Not reported                      | i.p.   | Mouse   | <sup>43</sup> |
| A-1155463 | < 0.010                    | Selective BCL-xL    | 5*               | 1.8*                  | > 0.18 μM for 12 hours*           | i.p.   | Mouse   | <sup>39</sup> |

**Supplementary Table 6 | Pharmacokinetic properties of BH3/BCL-xL disruptors in mice and humans.** All three compounds have been shown to be well tolerated in mice in multi-day dosing regimes, lasting between 14 to 21 days. <sup>†</sup>C<sub>max</sub> and exposure were determined on day three of a three day consecutive daily dosing regime, steady-state pharmacokinetic study. <sup>§</sup>Dose given as (mg/day). C<sub>max</sub> and exposure were determined on day 1 of dosing regime of consecutive daily doses for 14 days. 315 mg/day represents the max tolerated dose in humans. \*C<sub>max</sub> and exposure were determined following a single i.p. dose in mice.

## Supplementary Note 1: Peptide Sequences for constructs and domains

Cas9:

MDYKDDDDKDKKYSIGLDIGTNSVGWAVITDEYKVPSSKFKVLGNTDRHSIKKN  
LIGALLFDSGETAEATRLKRTARRRYTRRKNRICYLQEIFSNEMAKVDDSFHRL  
EESFLVEEDKKHERHPIFGNIVDEVAYHEKYPTIYHLRKKLVDSTDKADLRLIYLA  
LAHMIKFRGHFLIEGDLNPDNSDVKLFIQLVQTYNQLFEENPINASGVDAKAILS  
ARLSKSRLENLIAQLPGEKKNLFGNLIASLGLTPNFKSNFDLAEDAKLQLSK  
DTYDDDLNLLAQIGDQYADFLAAKNLSDAILLSDILRVNTEITKAPLSASMIKR  
YDEHHQDLTLLKALVRQQLPEKYKEIFFDQSKNGYAGYIDGGASQEEFYKFIKPI  
LEKMDGTEELLVKLNREDLLRKQRTFDNGSIPHQIHLGELHAILRRQEDFYFPLK  
DNREKIEKILTFRIPYYVGPLARGNSRFAWMTRKSEETITPWNFEEVVDKGASA  
QSFIERMTNFDKNLPNEKVLPHSLLYEYFTVYNELTKVKYVTEGMRKPAFLSG  
EQKKAIVDLLFKTNRKVTVKQLKEDYFKKIECFDSVEISGVEDRFNASLGTYHDL  
LKIIKDKDFLDNEENEDILEDIVLTLTLFEDREMIEERLKYAHLFDDKVMKQLKR  
RRYTGWGRLSRKLINGIRDKQSGKTILDFLKSDFANRNFMQLIHDDSLTFKEDI  
QKAQVSGQGDSLHEHIANLAGSPAIKKILQTVKVVDELVKVMGRHKPENIVIE  
MARENQTTQKGQKNSRERMKRIEELGKSGILKEHPVENTQLQNEKLYLYL  
QNGRDMYVDQELDINRLSDYDVDHIVPQSFLKDDSIDNKVLRSDKNRKGSDN  
VPSEEVVKKMKNYWRQLLNAKLITQRKFDNLTKAERGGLSELDKAGFIKRLVE  
TRQITKHAQILDSRMNTKYDENDKLIREVKVITLKSCLVSDFRKDFQFYKVIN  
NYHHAHDAYLNAVVGTAIKKYPKLESEFVYGDYKVYDVRKMIKSEQEIGKAT  
AKYFFYSNIMNFFKTEITLANGEIRKRPLIETNGETGEIVWDKGRDFATVRKVL  
MPQVNIVKTEVQTGGFSKESILPKRNSDKLIARKKDWDPKKYGGFDSPTVAYS  
VLVAKVEKKGSKKLSVKELLGITIMERSSEFEKNPIDFLEAKGYKEVKKDLIILP  
KYSLFELENGRKRMLASAGELQKGNELALPSKYVNFLYLASHYEKLGSPEDN  
EQKQLFVEQHKHYLDEIIEQISEFSKRVLADANLDKVL SAYNKHRDKPIREQAE  
NIIHLFTLTNLGAPAAFKYFDTTIDRKRYTSTKEVL DATLIHQ SITGLYETRIDLSQL  
GGDSRADPKKKRKV

ciCas9:

MDYKDDDDKDKKYSIGLDIGTNSVGWAVITDEYKVPSSKFKVLGNTDRHSIKKN  
LIGALLFDSGETAEATRLKRTARRRYTRRKNRICYLQEIFSNEMAKVDDSFHRL  
EESFLVEEDKKHERHPIFGNIVDEVAYHEKYPTIYHLRKKLVDSTDKADLRLIYLA  
LAHMIKFRGHFLIEGDLNPDNSSNRELVDVFLSYKLSQKGYSWSQFSDVEENR  
TEAPEGTESEMETPSAINGNPSWHLADSPAVNGATGHSSSLDAREVIPMAAVK  
QALREAGDEFELRYRRAFSDLTSQLHITPGTAYQSFEQVVELFRDGVN WGRI  
VAFFSFGGALCVESVDKEMQVLVSRIAAMATYLNHLEPWIQENGGWDTFV  
ELYGNNGSGTASGTGSGTGSATGSGTVNTEITKAPLSASMIKRYDEHHQDLTLL  
KALVRQQLPEKYKEIFFDQSKNGYAGYIDGGASQEEFYKFIKPILEKMDGTEELL  
VKLNREDLLRKQRTFDNGSIPHQIHLGELHAILRRQEDFYFPLKDNREKIEKILTF  
RIPYYVGPLARGNSRFAWMTRKSEETITPWNFEEVVDKGASAQSFIERMTNFD  
KNLPNEKVLPHSLLYEYFTVYNELTKVKYVTEGMRKPAFLSGEQKKAIVDLLFK  
TNRKVTVKQLKEDYFKKIECFDSVEISGVEDRFNASLGTYHDL LKIIKDKDFLDNE

ENEDILEDIVLTLTLFEDREMIEERLKTYAHLFDDKVMKQLKRRRYTGWGRLSR  
KLINGIRDKQSGKTILDFLKSDGFANRNFMLIHDDSLTFKEDIQKAQVSGQGDS  
LHEHIANLAGSPAIKKGILQTVKVVDELVKVMGRHKPENIVIEMARENQTTQKGQ  
KNSRERMKRIEEGIKELGSQILKEHPVENTQLQNEKLYLYYLQNGRDMYVDQEL  
DINRLSDYDVDHIVPQSFLKDDSIDNKVLTRSDKNRGKSDNVPSEEVVKKMKNY  
WRQLLNAKLITQRKFDNLTKAERGGLSELDKAGFIKRQLVETRQITKHVAQILDS  
RMNTKYDENDKLIREVKVITLKSCLVSDFRKDFQFYKVREINNYHHAHDAYLNA  
VVGTAIIKKYPKLESEFVYGDYKVYDVRKMIKSEQEIGKATAKYFFYSNIMNFF  
KTEITLANGEIRKRPLIETNGETGEIVWDKGRDFATVRKVL SMPQVNIVKKTEVQ  
TGGFSKESILPKRNSDKLIARKKDWDPKKYGGFDSPTVAYSVLVAKVEKGKSK  
KLKSVKELLGITIMERSSSFENPIDFLEAKGYKEVKKDLIIKLPKYSLFELENGRKR  
MLASAGELQKGNELALPSKYVNFLYLASHYEKLGSPEDNEQKQLFVEQHKHY  
LDEIIIEQISEFSKRVLADANLDKVL SAYNKHRDKPIREQAENIIHLFTLTNLGAPA  
AFKYFDTTIDRKRYTSTKEVLDATLIHQSI TGLYETRIDLSQLGGDSRADPKKKRK  
VTGSGTAPPNLWAAQRYGRELRRMADEGE GSFK

BCL-xL (res 2-197):

SNRELVVDFLSYKLSQKGY SWSQFSDVEENRTEAPEGTESEMETPSAINGNPS  
WHLADSPAVNGATGHSSSLDAREVIPMAAVKQALREAGDEFELRYRRAFSDLT  
SQLHITPGTAYQSFEQV VNELFRDGVNWGRIVAFFSFGGALCVESVDKEMQVL  
VSRIA AWMATYLNDHLEPWIQENGGWDTFVELYGN N

FLAG:

DYKDDDDK

NLS:

SRADPKKKRKV

enhanced specificity-ciCas9 (e-ciCas9):

MDYKDDDDDKDKKYSIGLDIGTNSVGVAVITDEYKVP SKKFKVLGNTDRHSIKKN  
LIGALLFDSGETAEATRLKRTARRRYTRRKNRICYLQEIFSNEMAKVDD SFFHRL  
EESFLVEEDKKHERHPIFGNIVDEVAYHEKYPTIYHLRKKLVDSTDKADLR LIYLA  
LAHMIKFRGHFLIEGDLNPDNSSNRELVVDFLSYKLSQKGY SWSQFSDVEENR  
TEAPEGTESEMETPSAINGNPSWHLADSPAVNGATGHSSSLDAREVIPMAAVK  
QALREAGDEFELRYRRAFSDLTSQLHITPGTAYQSFEQV VNELFRDGVNWGR I  
VAFFSFGGALCVESVDKEMQVLVSRIA AWMATYLNDHLEPWIQENGGWDTFV  
ELYGNNGSGTASGTGSGTG SATGSGTVNTEITKAPLSASMIKRYDEHHQDLTLL  
KALVRQQLPEKYKEIFFDQSKNGYAGYIDGGASQEEFYKFIKPILEKMDGTEELL  
VKLNREDLLRKQRTFDNGSIPHQIHLGELHAILRRQEDFY PFLKDNREKIEKILTF  
RIPYYVGPLARGNSRFAWMTRKSEETITPWNFE EVVDKGASAQSFIERMTNFD  
KNLPNEKVLPHSLLYEYFTVYNELTKVKYVTEGMRKPAFLSGEQKKAIVDLLFK  
TNRKVTVKQLKEDYFKKIECFDSVEISGVEDRFNASLGTYHDLLKIIKDKDFLDNE  
ENEDILEDIVLTLTLFEDREMIEERLKTYAHLFDDKVMKQLKRRRYTGWGRLSR  
KLINGIRDKQSGKTILDFLKSDGFANRNFMLIHDDSLTFKEDIQKAQVSGQGDS

LHEHIANLAGSPAIKKILQTVKVVDELVKVMGRHKPENIVIAMARENQTTQKGQ  
KNSRERMKRIEEGIKELGSQILKEHPVENTQLQNEKLYLYYLQNGRDMYVDQEL  
DINRLSDYDVDHIVPQSFLADDSIDNKVLTRSDKNRGKSDNVPSEEVVKMKMKNY  
WRQLLNAKLITQRKFDNLTKAERGGLSELDKAGFIKRQLVETRQITKHVAQILDS  
RMNTKYDENDKLIREVKVITLKSCLVSDFRKDFQFYKVREINNYHHAHDAYLNA  
VVGITALIKKYPALASEFVYGDYKVYDVRKMIKSEQEIGKATAKYFFYSNIMNFF  
KTEITLANGEIRKAPLIETNGETGEIVWDKGRDFATVRKVLSPQVNIKKTEVQ  
TGGFSKESILPKRNSDKLIARKKDWDPKYYGGFDSPTVAYSVLVAKVEKGGKSK  
KLKSVKELLGITIMERSSSFENPIDFLEAKGYKEVKKDLIIKLPKYSLELENGRKR  
MLASAGELQKGNELALPSKYVNFLYLASHYEKLGKSPEDNEQKQLFVEQHKHY  
LDEIIQISEFSKRVLADANLDKVL SAYNKHRDKPIREQAENIIHLFTLTNLGAPA  
AFKYFDTTIDRKRYTSTKEVL DATLIHQSI TGLYETRIDLSQLGGDSRADPKKKRK  
VTGSGTAPPNLWAAQRYGRELRRMADEGEESFK

### Supplementary References

53. Liang, X. *et al.* Rapid and highly efficient mammalian cell engineering via Cas9 protein transfection. *J. Biotechnol.* **208**, 44–53 (2015).
54. Liao, S., Tammaro, M. & Yan, H. Enriching CRISPR-Cas9 targeted cells by co-targeting the HPRT gene. *Nucleic Acids Res.* **43**, e134–e134 (2015).
55. Anders, C. & Jinek, M. In vitro enzymology of Cas9. *Meth. Enzymol.* **546**, 1–20 (2014).
